# Supplementary material
Source: MDPI journal article supplement (https://www.mdpi.com/2073-431X/12/1/15)
Supplement: s1 [file s1]

# Supplementary Materials: Capacitated Waste Collection Problem Solution Using Open-Source Tool

Adriano Santos Silva <sup>1,2,3,4,5,\*</sup>, Filipe Alves <sup>1,3,6,†</sup>, José Luis Diaz de Tuesta <sup>2,3,7</sup>, Ana Maria A. C. Rocha <sup>6</sup>, Ana I. Pereira <sup>1,3</sup>, Adrián M. T. Silva <sup>4,5,\*</sup> and Helder T. Gomes <sup>2,3</sup>

**Table S1.** Central depot (CD) and dumpsters locations.

| Site | Latitude       | Longitude      | Site | Latitude       | Longitude      |
|------|----------------|----------------|------|----------------|----------------|
| CD   | 41.82169681141 | -6.76443593490 | 25   | 41.81523678070 | -6.76620098764 |
| 1    | 41.78720474230 | -6.78118419571 | 26   | 41.80952920640 | -6.76642816497 |
| 2    | 41.81969833440 | -6.75789689978 | 27   | 41.81339008360 | -6.76738957375 |
| 3    | 41.81866836520 | -6.75533914580 | 28   | 41.81057094540 | -6.76262317495 |
| 4    | 41.80391311600 | -6.74591398243 | 29   | 41.80858583660 | -6.77203398202 |
| 5    | 41.81259155270 | -6.76252317395 | 30   | 41.80379020880 | -6.77500850312 |
| 6    | 41.80365371700 | -6.76502704655 | 31   | 41.80479706560 | -6.77945165024 |
| 7    | 41.80543899470 | -6.76429700929 | 32   | 41.80485933890 | -6.78266950155 |
| 8    | 41.81728363000 | -6.76014518727 | 33   | 41.80041444800 | -6.78203834713 |
| 9    | 41.81797409140 | -6.77046823459 | 34   | 41.80111176820 | -6.78497253628 |
| 10   | 41.80888366660 | -6.76223516545 | 35   | 41.80330480330 | -6.76184008495 |
| 11   | 41.79860687320 | -6.75750207924 | 36   | 41.80787015850 | -6.77042735615 |
| 12   | 41.81499862690 | -6.77017879526 | 37   | 41.80301580010 | -6.77329748574 |
| 13   | 41.79141235440 | -6.77258300782 | 38   | 41.79983337270 | -6.77148637944 |
| 14   | 41.81573486260 | -6.75953578858 | 39   | 41.81954918520 | -6.75925726449 |
| 15   | 41.80909347530 | -6.77342796251 | 40   | 41.81640496770 | -6.76043716543 |
| 16   | 41.79577636680 | -6.76426887492 | 41   | 41.81374158510 | -6.76067411678 |
| 17   | 41.81614685130 | -6.75683116867 | 42   | 41.81542200210 | -6.75655890661 |
| 18   | 41.79243087810 | -6.76876211244 | 43   | 41.81169821390 | -6.75974645274 |
| 19   | 41.80489730790 | -6.75844621742 | 44   | 41.80522300450 | -6.76014099295 |
| 20   | 41.80027389500 | -6.76562976839 | 45   | 41.79977009680 | -6.76815932707 |
| 21   | 41.81761075200 | -6.76406596806 | 46   | 41.80586417060 | -6.75822219431 |
| 22   | 41.79068357450 | -6.77954329093 | 47   | 41.79437674010 | -6.76375480015 |
| 23   | 41.78995667530 | -6.77221766031 | 48   | 41.79508199500 | -6.75988738044 |
| 24   | 41.80262259920 | -6.77134323359 | 49   | 41.80701653110 | -6.76360284746 |
|      |                |                | 50   | 41.81113349430 | -6.75566925811 |

[illegible]



[illegible]

**Table S5.** Filling velocities of the dumpsters on a daily basis (part I).

| Days | Dumpsters |      |      |      |      |      |      |      |      |      |      |      |      |      |      |      |      |      |      |      |
|------|-----------|------|------|------|------|------|------|------|------|------|------|------|------|------|------|------|------|------|------|------|
|      | 1         | 2    | 3    | 4    | 5    | 6    | 7    | 8    | 9    | 10   | 11   | 12   | 13   | 14   | 15   | 16   | 17   | 18   | 19   | 20   |
| 1    | 0         | 0    | 0    | 0    | 0    | 0    | 0    | 0    | 0    | 0    | 0    | 0    | 0    | 0    | 0    | 0    | 0    | 0    | 0    | 0    |
| 2    | 7.3       | 30.7 | 8.2  | 26.2 | 7.8  | 47.2 | 61.0 | 10.2 | 37.4 | 29.7 | 37.0 | 18.1 | 16.6 | 40.0 | 14.7 | 17.1 | 29.6 | 11.8 | 29.7 | 6.0  |
| 3    | 18.1      | 11.1 | 4.5  | 10.5 | 25.8 | 25.7 | 45.3 | 30.6 | 12.9 | 44.0 | 36.2 | 8.7  | 15.7 | 15.2 | 6.3  | 36.7 | 8.6  | 38.4 | 40.7 | 15.0 |
| 4    | 19.2      | 26.7 | 6.4  | 39.8 | 33.8 | 25.9 | 40.4 | 8.0  | 54.5 | 27.9 | 47.2 | 26.2 | 49.2 | 44.2 | 3.4  | 45.6 | 26.7 | 28.5 | 25.3 | 8.8  |
| 5    | 23.7      | 41.7 | 4.0  | 18.7 | 15.8 | 29.9 | 35.9 | 8.0  | 56.0 | 20.3 | 11.0 | 5.2  | 24.0 | 52.0 | 6.8  | 28.5 | 12.1 | 14.8 | 23.3 | 15.6 |
| 6    | 49.9      | 38.2 | 9.5  | 35.7 | 40.2 | 47.4 | 32.3 | 9.2  | 16.2 | 21.7 | 11.9 | 5.6  | 24.5 | 50.9 | 11.1 | 40.4 | 12.0 | 12.6 | 29.6 | 6.9  |
| 7    | 33.3      | 18.3 | 5.9  | 7.1  | 35.0 | 11.3 | 19.2 | 24.2 | 24.2 | 12.4 | 29.5 | 20.3 | 21.4 | 11.6 | 14.2 | 12.6 | 13.9 | 28.4 | 45.0 | 12.0 |
| 8    | 27.0      | 23.7 | 15.9 | 30.7 | 40.7 | 15.5 | 61.9 | 37.8 | 27.2 | 37.9 | 45.6 | 4.0  | 26.3 | 16.8 | 15.6 | 40.2 | 14.5 | 41.5 | 16.4 | 3.2  |
| 9    | 30.7      | 21.1 | 16.7 | 22.9 | 27.0 | 24.9 | 25.9 | 25.3 | 33.3 | 30.3 | 28.0 | 25.8 | 12.7 | 23.3 | 7.8  | 36.8 | 12.4 | 37.2 | 25.3 | 6.2  |
| 10   | 25.9      | 30.3 | 17.0 | 41.5 | 15.3 | 54.1 | 50.8 | 28.7 | 64.2 | 41.9 | 15.3 | 18.2 | 11.9 | 34.9 | 12.9 | 46.9 | 12.1 | 42.2 | 47.5 | 10.6 |
| 11   | 35.8      | 24.1 | 10.5 | 11.1 | 37.0 | 17.3 | 48.2 | 38.6 | 56.5 | 20.2 | 21.1 | 26.4 | 19.0 | 30.5 | 16.6 | 32.3 | 25.9 | 17.1 | 49.5 | 12.0 |
| 12   | 17.7      | 35.3 | 15.3 | 12.3 | 35.7 | 20.0 | 32.5 | 26.4 | 28.4 | 38.9 | 38.3 | 8.5  | 50.4 | 53.3 | 14.5 | 49.5 | 15.6 | 9.4  | 25.3 | 3.2  |
| 13   | 37.3      | 27.2 | 12.0 | 21.5 | 47.0 | 11.0 | 31.4 | 31.8 | 20.8 | 37.4 | 26.7 | 25.2 | 11.5 | 35.6 | 9.7  | 42.5 | 43.4 | 7.1  | 32.7 | 9.6  |
| 14   | 16.8      | 37.2 | 10.8 | 14.8 | 24.5 | 57.7 | 40.3 | 22.1 | 56.8 | 26.3 | 13.9 | 7.7  | 23.0 | 62.9 | 5.5  | 13.6 | 44.7 | 31.1 | 12.2 | 2.9  |
| 15   | 24.7      | 38.2 | 4.6  | 21.8 | 33.6 | 15.3 | 18.0 | 30.1 | 57.1 | 29.4 | 24.7 | 25.0 | 23.7 | 64.4 | 12.3 | 11.5 | 42.0 | 8.1  | 9.9  | 8.9  |
| 16   | 22.3      | 26.2 | 4.3  | 22.1 | 18.4 | 28.4 | 17.7 | 20.4 | 44.4 | 25.3 | 34.4 | 23.8 | 29.2 | 58.6 | 4.0  | 34.4 | 17.8 | 13.9 | 18.6 | 13.7 |
| 17   | 23.3      | 13.5 | 10.9 | 27.0 | 30.0 | 55.6 | 67.8 | 8.7  | 54.5 | 40.8 | 21.4 | 12.6 | 17.8 | 26.0 | 13.5 | 48.3 | 33.2 | 46.1 | 21.9 | 12.9 |
| 18   | 16.2      | 18.9 | 10.7 | 33.8 | 30.3 | 60.6 | 56.7 | 29.0 | 37.1 | 20.9 | 47.2 | 23.9 | 22.0 | 54.8 | 13.3 | 45.6 | 7.0  | 30.9 | 19.9 | 16.3 |
| 19   | 30.6      | 11.7 | 11.5 | 13.1 | 35.5 | 49.0 | 43.4 | 33.6 | 62.4 | 35.6 | 33.8 | 5.0  | 37.0 | 57.2 | 12.6 | 42.0 | 26.4 | 23.3 | 38.7 | 14.7 |
| 20   | 39.8      | 43.4 | 13.3 | 10.1 | 14.6 | 13.1 | 48.7 | 35.9 | 12.8 | 42.3 | 44.9 | 10.6 | 14.6 | 59.7 | 13.9 | 42.7 | 24.4 | 30.1 | 12.8 | 3.3  |
| 21   | 44.6      | 13.9 | 15.7 | 17.8 | 46.3 | 31.9 | 37.7 | 27.4 | 33.5 | 44.2 | 22.8 | 26.2 | 13.3 | 40.3 | 11.5 | 42.7 | 20.7 | 12.4 | 34.4 | 3.9  |
| 22   | 12.4      | 36.5 | 13.6 | 18.0 | 40.9 | 43.2 | 17.6 | 36.4 | 57.6 | 25.3 | 17.1 | 26.0 | 30.3 | 35.1 | 8.6  | 33.6 | 12.0 | 23.1 | 9.6  | 3.8  |
| 23   | 16.1      | 37.0 | 11.6 | 7.4  | 27.1 | 23.4 | 39.6 | 18.7 | 68.1 | 21.9 | 45.6 | 13.6 | 13.7 | 13.1 | 13.4 | 28.3 | 34.8 | 34.6 | 42.7 | 11.5 |
| 24   | 23.7      | 19.5 | 10.3 | 8.4  | 32.6 | 51.9 | 48.8 | 13.2 | 45.9 | 22.6 | 8.5  | 4.2  | 42.0 | 26.8 | 8.9  | 25.2 | 10.8 | 31.3 | 11.9 | 9.2  |
| 25   | 26.5      | 8.2  | 7.4  | 33.2 | 37.3 | 12.7 | 39.0 | 16.0 | 57.6 | 34.8 | 42.8 | 5.1  | 34.5 | 38.3 | 5.6  | 11.7 | 20.7 | 28.7 | 26.1 | 12.6 |
| 26   | 34.9      | 19.5 | 16.2 | 38.6 | 35.9 | 43.2 | 17.4 | 22.5 | 36.6 | 14.6 | 37.7 | 4.5  | 18.7 | 51.2 | 11.3 | 24.1 | 33.4 | 7.4  | 7.7  | 7.3  |
| 27   | 37.0      | 39.9 | 10.7 | 15.2 | 9.1  | 49.8 | 28.0 | 23.7 | 50.5 | 6.5  | 36.1 | 28.0 | 47.2 | 26.5 | 2.9  | 12.5 | 8.0  | 45.2 | 29.1 | 4.5  |
| 28   | 49.0      | 10.0 | 5.6  | 21.7 | 17.1 | 60.0 | 17.3 | 38.4 | 36.9 | 40.7 | 13.4 | 14.7 | 17.5 | 31.6 | 3.3  | 18.6 | 33.7 | 9.6  | 43.9 | 9.9  |
| 29   | 20.8      | 18.5 | 16.7 | 29.9 | 46.9 | 36.3 | 26.1 | 23.6 | 30.7 | 43.3 | 15.5 | 13.0 | 31.0 | 16.6 | 16.6 | 17.6 | 30.2 | 11.1 | 40.0 | 6.7  |
| 30   | 44.9      | 19.0 | 16.2 | 23.5 | 11.3 | 22.8 | 39.9 | 31.1 | 36.1 | 24.7 | 55.8 | 9.9  | 9.3  | 39.8 | 6.4  | 18.0 | 37.1 | 23.2 | 21.8 | 15.1 |

| Days |      | Dumpsters |      |      |      |      |      |      |      |      |      |      |      |      |      |      |      |      |      |      |      |  |  |  |  |  |  |  |  |
|------|------|-----------|------|------|------|------|------|------|------|------|------|------|------|------|------|------|------|------|------|------|------|--|--|--|--|--|--|--|--|
|      |      | 21        | 22   | 23   | 24   | 25   | 26   | 27   | 28   | 29   | 30   | 31   | 32   | 33   | 34   | 35   | 36   | 37   | 38   | 39   | 40   |  |  |  |  |  |  |  |  |
| 1    | 0.0  | 0.0       | 0.0  | 0.0  | 0.0  | 0.0  | 0.0  | 0.0  | 0.0  | 0.0  | 0.0  | 0.0  | 0.0  | 0.0  | 0.0  | 0.0  | 0.0  | 0.0  | 0.0  | 0.0  | 0.0  |  |  |  |  |  |  |  |  |
| 2    | 16.3 | 17.4      | 10.2 | 63.5 | 18.7 | 28.7 | 41.9 | 46.7 | 57.0 | 33.1 | 33.8 | 78.3 | 34.7 | 34.7 | 20.6 | 65.4 | 27.3 | 27.9 | 58.7 | 41.1 | 10.1 |  |  |  |  |  |  |  |  |
| 3    | 28.9 | 58.2      | 17.5 | 48.1 | 14.0 | 15.8 | 48.3 | 24.9 | 38.0 | 19.2 | 60.1 | 74.5 | 58.1 | 58.1 | 26.8 | 61.7 | 10.6 | 36.9 | 54.5 | 50.7 | 5.3  |  |  |  |  |  |  |  |  |
| 4    | 18.9 | 21.6      | 17.3 | 52.0 | 13.2 | 48.6 | 47.5 | 60.0 | 69.3 | 25.9 | 24.8 | 80.8 | 17.7 | 17.7 | 16.6 | 58.2 | 8.4  | 43.5 | 53.5 | 50.7 | 9.4  |  |  |  |  |  |  |  |  |
| 5    | 25.0 | 35.1      | 15.5 | 48.0 | 30.6 | 33.6 | 29.3 | 26.4 | 71.1 | 12.0 | 79.8 | 78.9 | 25.5 | 25.5 | 53.2 | 48.3 | 25.5 | 28.3 | 30.0 | 43.2 | 6.8  |  |  |  |  |  |  |  |  |
| 6    | 16.5 | 16.3      | 4.2  | 22.5 | 26.2 | 49.2 | 33.0 | 41.7 | 32.5 | 29.9 | 21.0 | 64.3 | 15.8 | 19.7 | 55.8 | 45.0 | 34.7 | 45.0 | 21.7 | 7.9  | 7.9  |  |  |  |  |  |  |  |  |
| 7    | 16.0 | 10.2      | 13.6 | 63.2 | 6.0  | 43.1 | 20.0 | 59.8 | 57.4 | 27.5 | 40.7 | 18.2 | 57.7 | 17.8 | 12.8 | 9.5  | 16.9 | 56.6 | 50.5 | 5.1  | 5.1  |  |  |  |  |  |  |  |  |
| 8    | 6.4  | 46.6      | 14.5 | 25.4 | 8.5  | 39.8 | 46.0 | 77.7 | 31.2 | 25.4 | 38.9 | 71.9 | 55.4 | 40.0 | 24.5 | 16.6 | 55.6 | 36.8 | 43.1 | 2.4  | 2.4  |  |  |  |  |  |  |  |  |
| 9    | 30.6 | 54.3      | 10.5 | 10.5 | 37.8 | 37.7 | 44.5 | 66.4 | 52.3 | 39.1 | 49.3 | 17.4 | 20.5 | 20.1 | 42.4 | 11.3 | 48.4 | 27.9 | 47.8 | 2.4  | 2.4  |  |  |  |  |  |  |  |  |
| 10   | 30.1 | 13.0      | 18.3 | 41.3 | 10.9 | 53.9 | 29.1 | 43.7 | 14.5 | 35.2 | 71.3 | 54.8 | 16.5 | 55.7 | 11.4 | 14.7 | 23.4 | 46.7 | 29.6 | 11.6 | 11.6 |  |  |  |  |  |  |  |  |
| 11   | 11.3 | 46.9      | 4.8  | 69.1 | 13.8 | 9.2  | 48.3 | 37.7 | 48.2 | 28.3 | 32.7 | 37.6 | 9.1  | 10.0 | 39.8 | 29.8 | 42.2 | 55.0 | 24.3 | 11.0 | 11.0 |  |  |  |  |  |  |  |  |
| 12   | 7.9  | 52.3      | 17.4 | 60.3 | 11.6 | 59.2 | 50.5 | 74.3 | 12.7 | 45.4 | 33.5 | 33.1 | 10.3 | 17.0 | 11.6 | 41.2 | 46.4 | 45.8 | 27.9 | 3.1  | 3.1  |  |  |  |  |  |  |  |  |
| 13   | 15.4 | 20.8      | 18.3 | 47.0 | 24.2 | 42.3 | 36.6 | 51.0 | 17.2 | 27.7 | 52.8 | 26.0 | 20.1 | 35.5 | 36.2 | 41.1 | 43.5 | 38.4 | 43.6 | 10.6 | 10.6 |  |  |  |  |  |  |  |  |
| 14   | 13.3 | 23.2      | 10.5 | 38.6 | 25.5 | 20.7 | 21.4 | 37.3 | 33.1 | 8.4  | 22.2 | 33.8 | 12.2 | 44.7 | 21.7 | 21.6 | 50.6 | 13.8 | 13.7 | 11.1 | 11.1 |  |  |  |  |  |  |  |  |
| 15   | 16.2 | 36.7      | 10.5 | 39.2 | 17.5 | 27.6 | 58.2 | 70.0 | 43.0 | 6.8  | 35.1 | 78.0 | 11.5 | 53.6 | 62.9 | 41.5 | 50.6 | 25.1 | 24.9 | 2.7  | 2.7  |  |  |  |  |  |  |  |  |
| 16   | 18.2 | 23.9      | 10.5 | 44.2 | 28.1 | 14.7 | 15.5 | 81.8 | 45.2 | 16.8 | 28.9 | 63.0 | 36.7 | 15.0 | 25.8 | 15.8 | 17.0 | 13.8 | 9.9  | 4.6  | 4.6  |  |  |  |  |  |  |  |  |
| 17   | 25.4 | 17.0      | 16.6 | 35.8 | 11.3 | 59.7 | 57.2 | 14.5 | 42.4 | 30.9 | 58.9 | 69.9 | 26.1 | 42.7 | 30.1 | 14.6 | 17.0 | 13.8 | 9.9  | 4.6  | 4.6  |  |  |  |  |  |  |  |  |
| 18   | 21.9 | 48.4      | 13.0 | 23.3 | 17.5 | 58.8 | 29.8 | 42.1 | 14.9 | 42.5 | 75.3 | 56.2 | 44.4 | 36.6 | 45.5 | 15.6 | 35.6 | 36.5 | 27.5 | 9.1  | 9.1  |  |  |  |  |  |  |  |  |
| 19   | 33.7 | 29.8      | 10.5 | 36.5 | 21.7 | 46.1 | 38.4 | 22.7 | 25.4 | 8.0  | 38.1 | 43.9 | 9.4  | 11.1 | 39.5 | 13.9 | 16.6 | 26.1 | 11.4 | 9.6  | 9.6  |  |  |  |  |  |  |  |  |
| 20   | 33.7 | 24.7      | 17.5 | 67.3 | 18.1 | 43.6 | 38.8 | 77.3 | 54.0 | 23.9 | 80.3 | 51.7 | 47.4 | 46.8 | 31.3 | 7.8  | 36.6 | 18.5 | 10.5 | 2.2  | 2.   |  |  |  |  |  |  |  |  |

**Table S7.** Amount of waste inside dumpsters in a daily basis (part III).

| Days | Dumpsters |      |      |      |      |      |      |      |      |      |  |  |  |  |  |
|------|-----------|------|------|------|------|------|------|------|------|------|--|--|--|--|--|
|      | 41        | 42   | 43   | 44   | 45   | 46   | 47   | 48   | 49   | 50   |  |  |  |  |  |
| 1    | 0         | 0    | 0    | 0    | 0    | 0    | 0    | 0    | 0    | 0    |  |  |  |  |  |
| 2    | 66.0      | 24.2 | 17.8 | 17.5 | 9.1  | 11.2 | 10.0 | 14.2 | 42.7 | 44.0 |  |  |  |  |  |
| 3    | 66.8      | 10.5 | 18.8 | 41.0 | 28.8 | 6.5  | 31.9 | 12.5 | 21.0 | 64.9 |  |  |  |  |  |
| 4    | 85.2      | 10.8 | 33.9 | 41.8 | 34.0 | 11.5 | 22.3 | 8.4  | 54.4 | 28.9 |  |  |  |  |  |
| 5    | 28.0      | 24.5 | 21.6 | 46.0 | 9.6  | 6.4  | 27.7 | 5.2  | 16.7 | 64.5 |  |  |  |  |  |
| 6    | 18.4      | 14.3 | 43.1 | 39.2 | 31.8 | 23.2 | 20.9 | 5.9  | 33.2 | 33.4 |  |  |  |  |  |
| 7    | 74.0      | 9.1  | 16.2 | 32.5 | 42.1 | 10.3 | 28.8 | 5.8  | 45.9 | 50.9 |  |  |  |  |  |
| 8    | 35.9      | 25.7 | 47.5 | 46.6 | 24.3 | 21.3 | 32.8 | 7.4  | 49.7 | 50.7 |  |  |  |  |  |
| 9    | 73.5      | 9.5  | 26.9 | 18.2 | 12.3 | 29.0 | 14.5 | 7.1  | 20.5 | 11.2 |  |  |  |  |  |
| 10   | 40.3      | 23.9 | 46.9 | 21.8 | 37.2 | 20.8 | 6.8  | 10.1 | 31.5 | 41.9 |  |  |  |  |  |
| 11   | 42.9      | 26.8 | 27.7 | 37.3 | 38.1 | 26.6 | 14.4 | 3.5  | 69.6 | 17.2 |  |  |  |  |  |
| 12   | 72.9      | 36.5 | 36.6 | 28.8 | 9.8  | 27.4 | 30.4 | 7.1  | 61.0 | 20.2 |  |  |  |  |  |
| 13   | 42.0      | 21.5 | 47.4 | 25.7 | 19.6 | 16.3 | 20.1 | 18.9 | 20.0 | 33.5 |  |  |  |  |  |
| 14   | 40.8      | 16.8 | 23.9 | 14.9 | 31.5 | 15.4 | 6.2  | 16.0 | 22.2 | 50.4 |  |  |  |  |  |
| 15   | 42.8      | 18.5 | 14.2 | 31.8 | 30.0 | 11.1 | 20.4 | 5.9  | 30.1 | 62.9 |  |  |  |  |  |
| 16   | 78.1      | 22.2 | 44.3 | 35.3 | 11.7 | 26.1 | 8.2  | 5.6  | 68.0 | 38.8 |  |  |  |  |  |
| 17   | 23.7      | 5.7  | 10.9 | 19.6 | 42.7 | 27.6 | 12.8 | 10.7 | 65.5 | 30.0 |  |  |  |  |  |
| 18   | 19.8      | 14.3 | 25.4 | 10.7 | 41.7 | 20.3 | 24.5 | 12.7 | 43.9 | 13.0 |  |  |  |  |  |
| 19   | 32.2      | 27.0 | 37.7 | 43.3 | 18.8 | 5.8  | 22.6 | 4.3  | 39.0 | 60.4 |  |  |  |  |  |
| 20   | 43.4      | 27.9 | 48.2 | 28.9 | 43.3 | 23.4 | 29.4 | 6.3  | 29.9 | 31.7 |  |  |  |  |  |
| 21   | 44.5      | 30.5 | 25.3 | 7.4  | 9.5  | 8.4  | 28.5 | 20.0 | 63.6 | 20.8 |  |  |  |  |  |
| 22   | 28.7      | 32.1 | 31.3 | 39.4 | 39.8 | 20.9 | 32.1 | 13.8 | 16.0 | 11.5 |  |  |  |  |  |
| 23   | 62.5      | 28.7 | 19.4 | 33.6 | 7.2  | 29.9 | 27.3 | 20.8 | 56.4 | 42.6 |  |  |  |  |  |
| 24   | 26.7      | 36.3 | 26.9 | 9.6  | 36.4 | 34.2 | 28.9 | 6.9  | 67.3 | 38.5 |  |  |  |  |  |
| 25   | 50.8      | 21.6 | 18.0 | 7.4  | 16.6 | 10.1 | 15.4 | 12.5 | 53.8 | 20.6 |  |  |  |  |  |
| 26   | 43.3      | 14.5 | 23.9 | 8.5  | 21.6 | 25.2 | 5.2  | 17.7 | 55.9 | 31.0 |  |  |  |  |  |
| 27   | 41.6      | 24.6 | 17.4 | 14.6 | 7.8  | 10.7 | 23.0 | 12.5 | 30.5 | 56.5 |  |  |  |  |  |
| 28   | 33.3      | 7.6  | 48.1 | 16.7 | 32.0 | 20.4 | 27.7 | 14.8 | 43.0 | 40.2 |  |  |  |  |  |
| 29   | 14.2      | 7.3  | 49.5 | 41.2 | 19.1 | 13.2 | 20.2 | 6.1  | 46.0 | 58.4 |  |  |  |  |  |
| 30   | 80.3      | 29.8 | 52.6 | 19.1 | 30.6 | 9.7  | 13.4 | 10.3 | 26.9 | 12.4 |  |  |  |  |  |



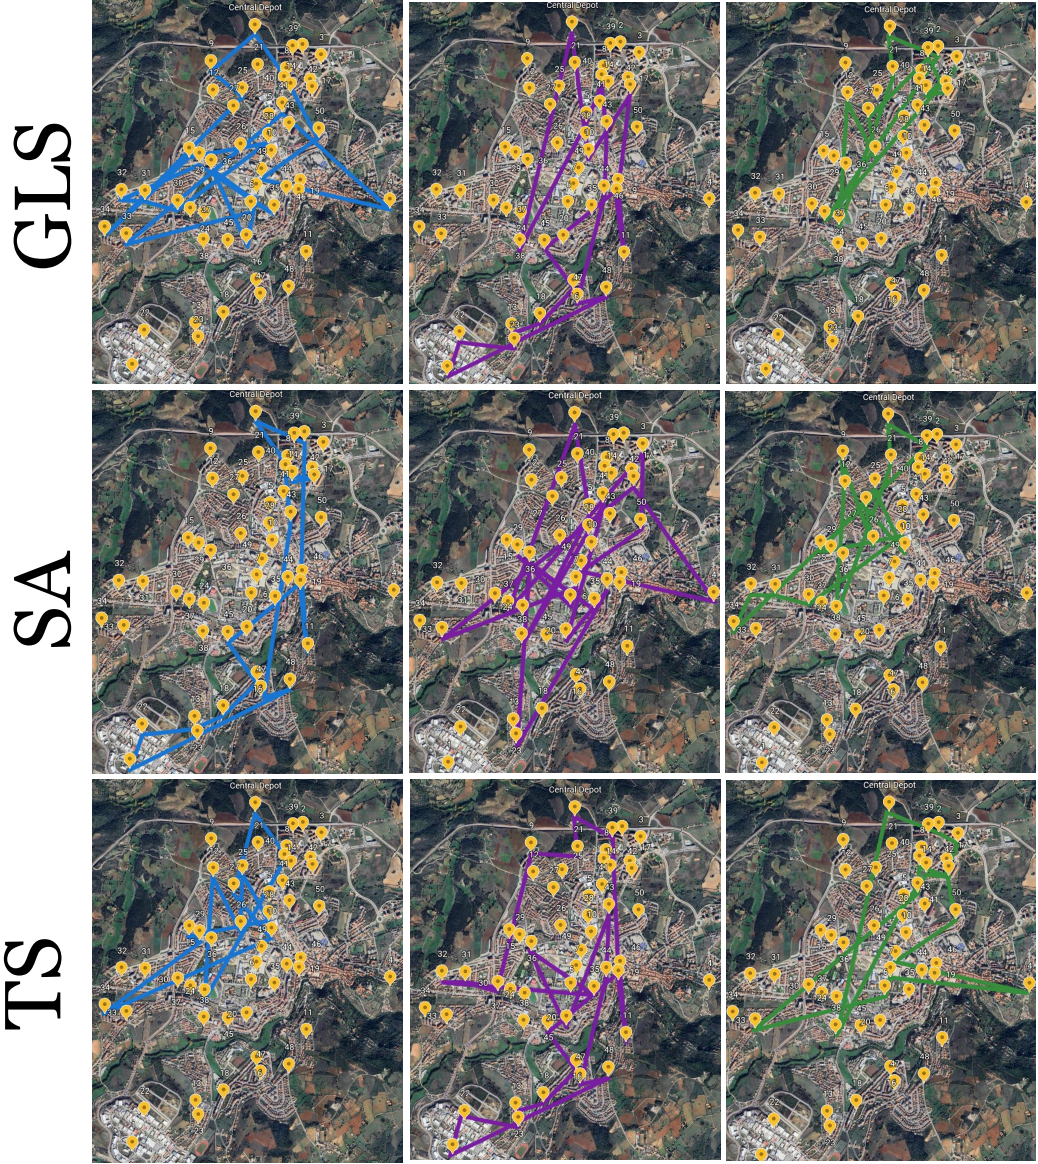

Figure S1. Routes for the trucks according to GLS, SA, and TS.
